# Supplementary material
Source: publisher figshare collection journal article supplement (https://acs.figshare.com/ndownloader/files/5302339)
Supplement: Supplementary file 1 [file 5302339]

# Supporting Information

## Significantly Increasing the Ductility of High Performance Polymer Semiconductors Through Polymer Blending

*Joshua I. Scott,<sup>1</sup> Xiao Xue,<sup>1</sup> Ming Wang,<sup>2</sup> R. Joseph Kline,<sup>3</sup> Benjamin C. Hoffman,<sup>4</sup> Daniel Dougherty,<sup>4</sup> Chuanzhen Zhou,<sup>5</sup> Guillermo Bazan,<sup>2</sup> and Brendan T. O'Connor<sup>1\*</sup>*

<sup>1</sup> Department of Mechanical and Aerospace Engineering, North Carolina State University, Raleigh, NC 27695, USA

<sup>2</sup> Center for Polymers and Organic Solids, University of California-Santa Barbara, Santa Barbara, CA 93106, USA

<sup>3</sup> National Institute of Standards and Technology, Material Measurement Laboratory, Gaithersburg, MD 20899, USA

<sup>4</sup> Organic and Carbon Electronics Laboratory, Department of Physics, North Carolina State University, Raleigh, NC 27695, USA

<sup>5</sup> Analytical Instrumentation Facility, North Carolina State University, Raleigh, NC 27695, USA

\* btoconno@ncsu.edu

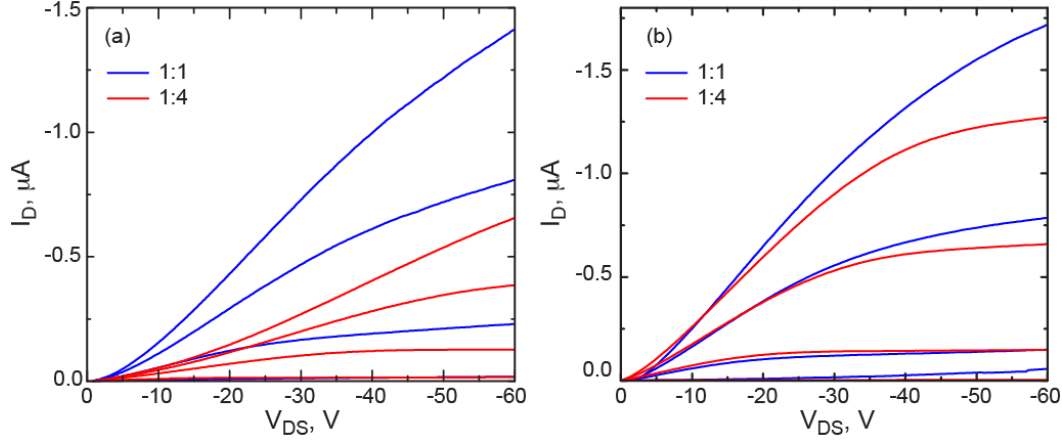

**Figure S1.** Output characteristics of 5  $\mu\text{m}$  channel length devices for the 1:1 and 1:4 blend films that were (a) unstrained and (b) strained by 75 % for transport parallel to the strain direction.

In **Figure S2**, the resistance is estimated following a previously described method.<sup>1</sup> Here, we only briefly describe the method. The resistance is estimated by taking the slope of the inverse of the current with channel length at a source-drain voltage of -60 V and at various gate-source voltages. The slope is then extrapolated to a zero channel length and multiplied by the source-drain voltage as an estimate of the contact resistance. The channel resistance per  $\mu\text{m}$  of channel length is estimated by taking the slope of the inverse of the drain current vs. channel length multiplied by the source-drain voltage.<sup>1</sup>

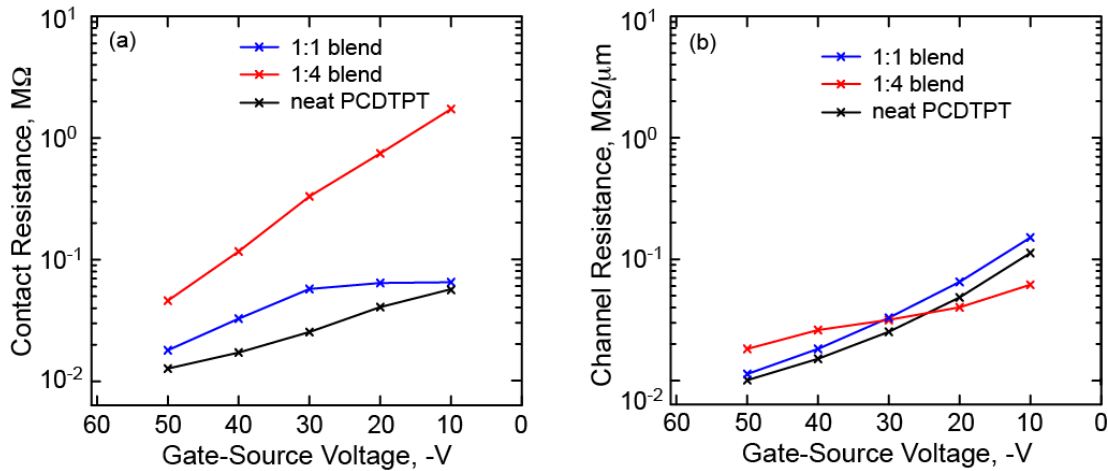

**Figure S2.** The total contact resistance (a) and channel resistance per  $\mu\text{m}$  of channel length (b) given for a source-drain voltage of -60V, for a channel width of 1000  $\mu\text{m}$ .

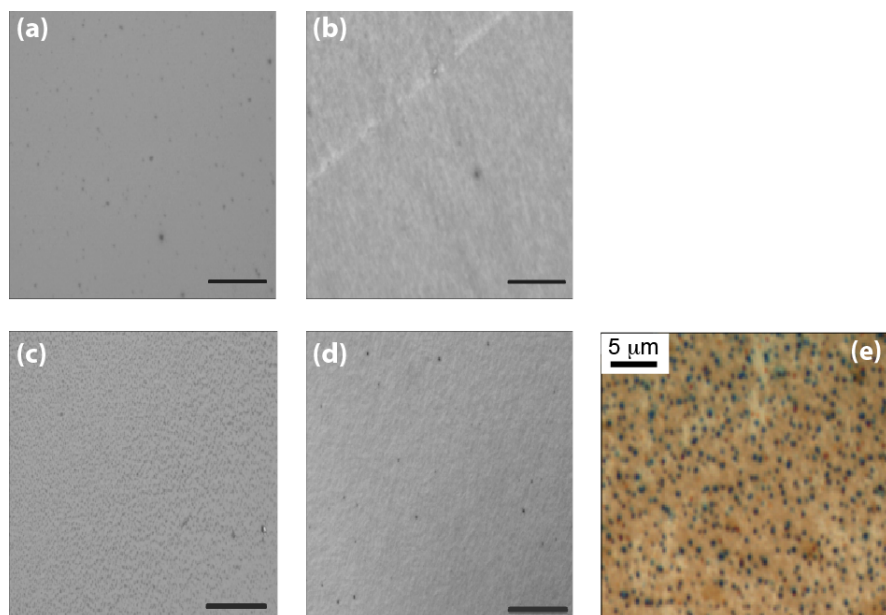

**Figure S3.** Optical microscope image of unstrained (0%) and 75% strained blend films. a) 1:1 PCDTPT:P3HT unstrained film. b) 1:4 PCDTPT:P3HT unstrained film. c) 1:1 PCDTPT:P3HT 75% strained film. d) 1:4 PCDTPT:P3HT 75% strained film. The scale bar in the image is 40  $\mu\text{m}$ . (e) Higher magnification microscope image of lateral segregation in 1:1 PCDTPT:P3HT blend film. The greenish blue spots are attributed to be PCDTPT.

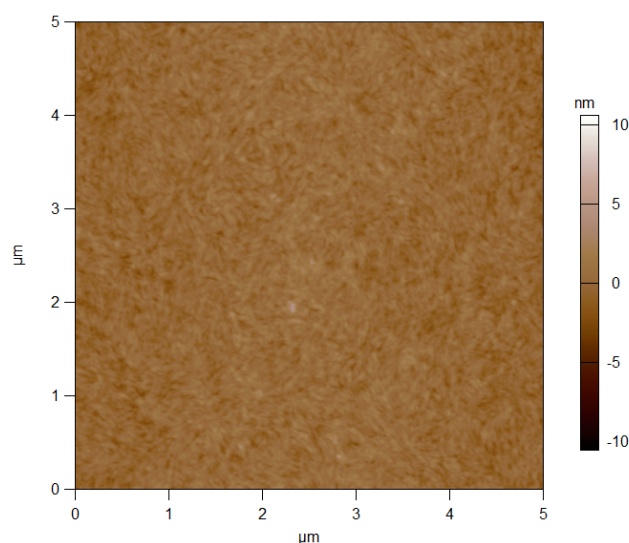

**Figure S4.** AFM image of neat PCDTPT film, showing no signs of nodule formation as observed in the 1:4 film.

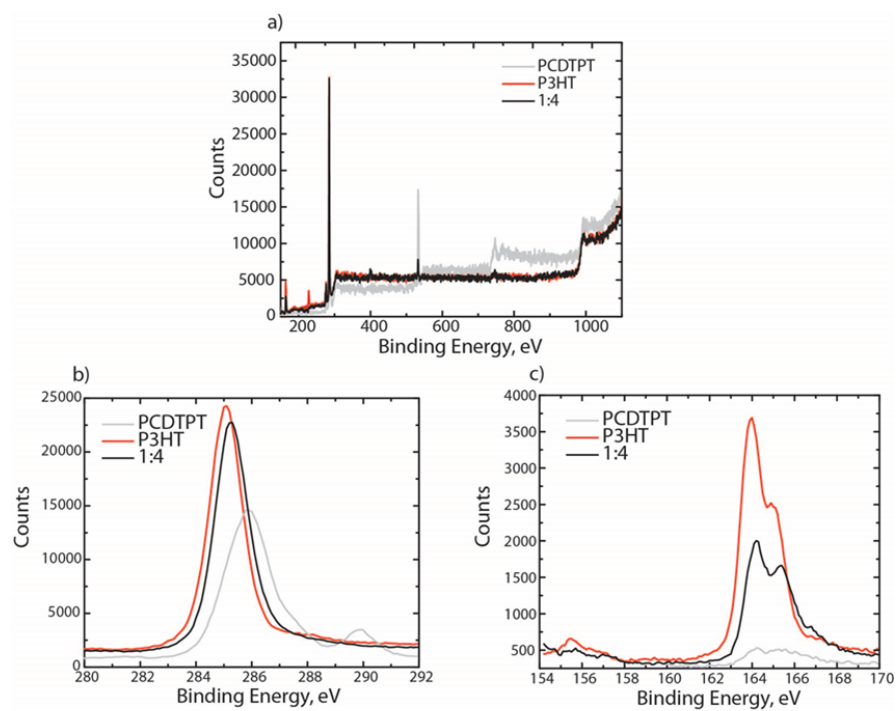

**Figure S5.** XPS data of PCDTPT, P3HT, and 1:4 PCDTPT:P3HT films. a) is a survey, b) is C 1s and c) is S 2p.

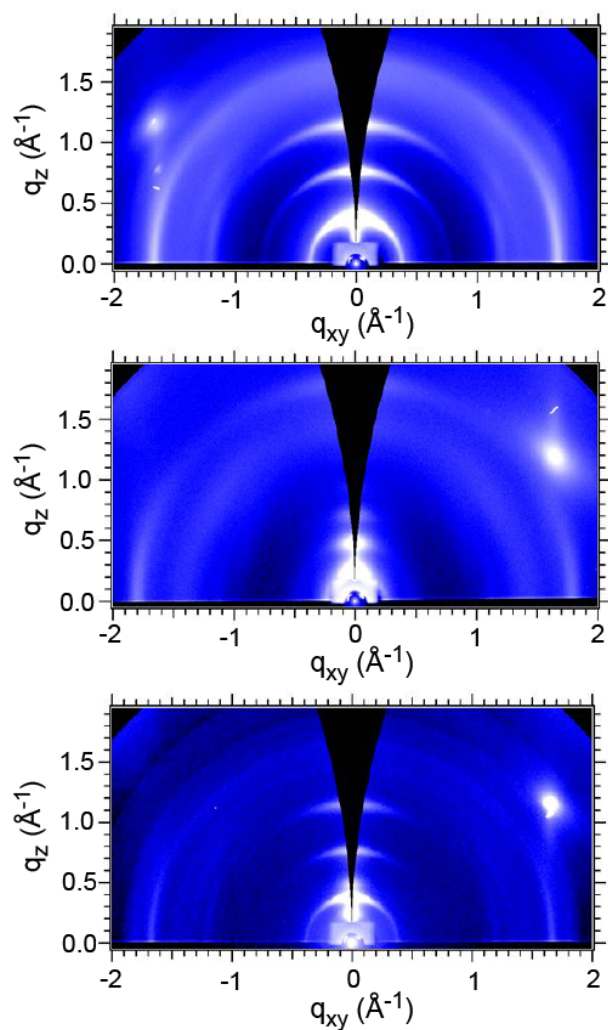

**Figure S6.** 2D GIXD images of (top) neat P3HT film, (middle) neat PCDTPT film, (bottom) 1:4 P3HT:PCDTPT blend film. Bright spots in the upper corners of images are due to the silicon substrate.

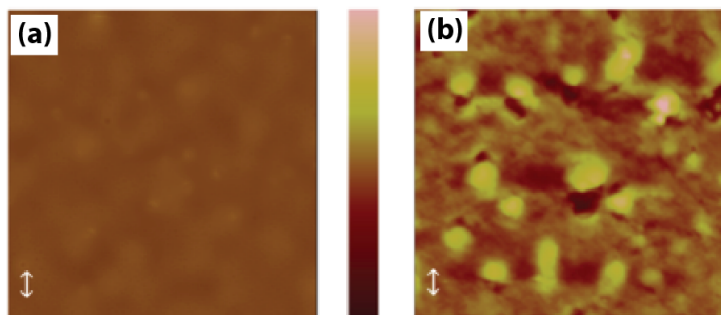

**Figure S7.** AFM images of strained PCDTPT:P3HT films. a) 1:1 PCDTPT:P3HT film under 25% strain. b) 1:1 PCDTPT:P3HT film under 50% strain. The scan area is 5  $\mu\text{m}$  x 5  $\mu\text{m}$ .

## REFERENCES

1. Klauk, H.; Schmid, G.; Radik, W.; Weber, W.; Zhou, L.; Sheraw, C.D.; Nichols, J.A.; Jackson, T.N.; Contact Resistance in Organic Thin Film Transistors, *Solid-State Electron.* **2003**, *47*, 297-301.
